# Supplementary material
Source: publisher figshare collection journal article supplement (https://sage.figshare.com/ndownloader/files/14909384)
Supplement: Supplementary file 1 [file 14909384]

**Details on Data Exclusions**

Following our pre-registered protocol, we excluded 48 participants who failed to pass at least one of the following measures: an attention check question, a question asking if participants responded randomly, and a question asking if participants looked up information online during the study. An additional 11 participants were excluded because they did not provide at least 4 valid estimates in response to the anchoring questions. Following our pre-registered protocol, we further excluded 18 individual estimates, which are detailed in Table S1.

*Table S1: Excluded Estimates from Anchoring Questions*

| Condition | Total Number of  Exclusions | Participant ID (Excluded Estimate) |
| --- | --- | --- |
| Meat - Low | 2 | 897 (400000)  408 (100000) |
| Meat -High | 1 | 648 (500000) |
| Chicago-Low | 4 | 848 (300)  120 (300)  990 (250)  500 (150) |
| Chicago-High | 1 | 795 (1300) |
| Phone-Low | 2 | 810 (1700)  869 (1700) |
| Phone-High | 0 |  |
| Cat-Low | 1 | 846 (80) |
| Cat-High | 1 | 812 (80) |
| Gas-Low | 2 | 961 (10000)  215 (5000) |
| Gas-High | 4 | 486 (2000)  761 (1500)  92 (1500)  69 (1300) |
| Arctic-Low | 0 |  |
| Arctic-High | 0 |  |

*Table S2: Correlations Among Big Five Traits*

|  | *M* | *SD* | Openness | Conscientiousness | Extraversion | Agreeableness | Neuroticism |
| --- | --- | --- | --- | --- | --- | --- | --- |
| Openness | 81.84 | 12.63 | (.85) |  |  |  |  |
| Conscientiousness | 90.49 | 14.75 | .15*** | (.93) |  |  |  |
| Extraversion | 73.18 | 14.33 | .26*** | .41*** | (.89) |  |  |
| Agreeableness | 89.46 | 11.73 | .37*** | .43*** | .14*** | (.89) |  |
| Neuroticism | 65.02 | 17.87 | -.08* | -.61*** | -.63*** | -.20*** | (.92) |

*Note*. *p < .05. ***p < .001. Cronbach’s alpha is given in parentheses. Items were rated on a scale from 1 to 5.

**Participant Demographic Details**

Table S3 provides a summary of the demographic variables we collected for participants. The mean age of participants was 37.40 (*SD* = 12.00) and ranged from 18 to 84.

*Table S3: Participant Demographics*

| Demographic Variable | Frequency (Percentage) |
| --- | --- |
| Gender | Female: 523 (55.3) |
|  | Male: 409 (43.3) |
|  | Transgender male: 1 (.1) |
|  | Other: 3 (.3) |
|  | Prefer not to answer: 5 (.5) |
|  |  |
| Ethnicity | White/Caucasian (not of Hispanic origin): 739 (78.2) |
|  | Black/African American (not of Hispanic origin): 65 (6.9) |
|  | African/Caribbean: 3 (.3) |
|  | Black/African: 11 (1.2) |
|  | Hispanic/European continent: 5 (.5) |
|  | Hispanic/Central American: 8 (.8) |
|  | Hispanic/South American: 7 (.7) |
|  | Latina/Latino: 19 (2.0) |
|  | Asian-American: 28 (3.0) |
|  | South Asian: 8 (.8) |
|  | East Asian: 6 (.6) |
|  | Southeast Asian: 4 (.4) |
|  | Middle Eastern: 2 (.2) |
|  | Native American/Native Alaskan/American Indian: 7 (.7) |
|  | Biracial/Multiethnic: 21 (2.2) |
|  | Other: 4 (.4) |
|  | Prefer not to answer: 6 (.6) |
|  |  |
| Education | Some high school: 5 (.5) |
|  | High school diploma, GED, or equivalent: 97 (10.3) |
|  | Some college: 242 (25.6) |
|  | Associate’s Degree:124 (13.1) |
|  | Bachelor’s Degree or equivalent: 310 (32.8) |
|  | Some post-graduate school: 41 (4.3) |
|  | Master’s degree: 98 (10.4) |
|  | Professional degree or Ph.D.: 24 (2.5) |
|  |  |
|  |  |
| Income | <$15,000: 135 (14.3) |
|  | $15,000-$30,000: 166 (17.6) |
|  | $30,000-$45,000: 191 (20.2) |
|  | $45,000-$60,000: 166 (17.6) |
|  | $60,000-$75,000: 115 (12.2) |
|  | $75,000-$90,000: 72 (7.6) |
|  | $90,000-$105,000: 47 (5.0) |
|  | $105,000-$120,000: 18 (1.9) |
|  | $120,000-$135,000: 4 (.4) |
|  | $135,000-$150,000: 9 (1.0) |
|  | >$150,000: 18 (1.9) |
|  |  |
| Native English Speaker? | Yes: 926 (98.0) |
|  | No: 17 (1.8) |

*Note*. Percentages may not sum to 100 if all participants did not complete a given measure.
